## **MICU1 regulates mitochondrial cristae structure and function independent of the mitochondrial calcium uniporter channel**

Dhanendra Tomar<sup>1</sup>, Manfred Thomas<sup>1</sup>, Joanne F. Garbincius<sup>1</sup>, Devin W. Kolmetzky<sup>1</sup>, Oniel Salik<sup>1,2</sup>, Pooja Jadiya<sup>1</sup>, April C. Carpenter<sup>2</sup>, John W. Elrod<sup>1\*</sup>

<sup>1</sup> Center for Translational Medicine, Department of Pharmacology, Lewis Katz School of Medicine at Temple University, Philadelphia, PA 19140

<sup>2</sup> Ursinus College, Collegeville, PA 19426, USA

### **\*Correspondence:**

John W. Elrod, PhD

Center for Translational Medicine

3500 N Broad St, MERB 949

Philadelphia, PA 19140

Office: (215) 707-5480

LAB: (215) 707-9144

Fax: (215) 707-9890

[elrod@temple.edu](mailto:elrod@temple.edu)

[elrodlab.org](http://elrodlab.org)

**Conflict of interest:** The authors have no financial conflict of interest to report.

**Keywords:** mitochondria; calcium regulation; calcium signaling; MICU1; cristae junctions; MICOS; MIC60; CHCHD2; MCU; mtCU;

## 1 **Abstract**

2 MICU1 is an EF-hand-containing mitochondrial protein that is essential for gating of the  
3 mitochondrial  $\text{Ca}^{2+}$  uniporter channel (mtCU) and is reported to interact directly with the pore-  
4 forming subunit, MCU and scaffold EMRE. However, using size-exclusion proteomics, we found  
5 that MICU1 exists in mitochondrial complexes lacking MCU. This suggests that MICU1 may  
6 have additional cellular functions independent of regulating mitochondrial  $\text{Ca}^{2+}$  uptake. To  
7 discern mtCU-independent MICU1 functions, we employed a proteomic discovery approach  
8 using BiOLD2-mediated proximity-based (<10nm) biotinylation and subsequent LC-MS detection.  
9 The expression of a MICU1-BiOLD2 fusion protein in *MICU1*<sup>-/-</sup> and *MCU*<sup>-/-</sup> cells allowed the  
10 identification of total vs. mtCU-independent MICU1 interactors. Bioinformatics identified the  
11 Mitochondrial Contact Site and Cristae Organizing System (MICOS) components MIC60  
12 (encoded by the *IMMT* gene) and Coiled-coil-helix-coiled-coil helix domain containing 2  
13 (CHCHD2) as novel MICU1 interactors, independent of the mtCU. We demonstrate that MICU1  
14 is essential for proper proteomic organization of the MICOS complex and that MICU1 ablation  
15 results in altered cristae organization and mitochondrial ultrastructure. We hypothesize that  
16 MICU1 serves as a MICOS calcium sensor, since perturbing MICU1 is sufficient to modulate  
17 cytochrome c release independent of mitochondrial  $\text{Ca}^{2+}$  uptake across the inner mitochondrial  
18 membrane (IMM). Here, we provide the first experimental evidence suggesting that MICU1  
19 regulates cellular functions independent of mitochondrial calcium uptake and may serve as a  
20 critical mediator of  $\text{Ca}^{2+}$ -dependent signaling to modulate mitochondrial membrane dynamics  
21 and cristae organization.

## 22 **Introduction**

23 Calcium ( $\text{Ca}^{2+}$ ) is well characterized as an essential second messenger that regulates  
24 numerous cellular functions by binding distinct  $\text{Ca}^{2+}$  sensing domains or motifs present on  
25 numerous proteins (Bagur and Hajnoczky, 2017; Carafoli, 2002, 2003). Most  $\text{Ca}^{2+}$  sensors  
26 contain more than one  $\text{Ca}^{2+}$  binding domain, often with varied affinities for  $\text{Ca}^{2+}$  binding,  
27 resulting in diverse and graded functions in a variety of cellular processes (Bagur and  
28 Hajnoczky, 2017; Carafoli, 2002, 2003; Tadross et al., 2008). The  $\text{Ca}^{2+}$  concentration varies  
29 greatly between different cellular compartments, and thus  $\text{Ca}^{2+}$  sensors are strategically  
30 localized for subcellular/organelle specific signaling (Bagur and Hajnoczky, 2017; Rizzuto et al.,  
31 2012; Rizzuto and Pozzan, 2006). Mitochondria actively regulate their  $\text{Ca}^{2+}$  concentration and  
32 contain  $\text{Ca}^{2+}$  sensors to mediate anterograde and retrograde signaling (Bagur and Hajnoczky,  
33 2017; Rizzuto et al., 2012). Examples include Mitochondrial Rho GTPases (MIROs) localized to  
34 the outer mitochondrial membrane (OMM), and Mitochondrial calcium uptake proteins (MICUs)  
35 localized to the inter-membrane space (IMS) side of the IMM (Bagur and Hajnoczky, 2017;  
36 Fransson et al., 2003; Perocchi et al., 2010; Plovanich et al., 2013). MIRO  $\text{Ca}^{2+}$  sensing is  
37 essential for mitochondrial trafficking and structural homeostasis (Bagur and Hajnoczky, 2017;  
38 Fransson et al., 2003; Frederick et al., 2004; Nemani et al., 2018; Saotome et al., 2008), while  
39 MICUs are known to gate the mitochondrial calcium uniporter channel (mtCU) and regulate its  
40 open probability (Csordas et al., 2013; Liu et al., 2016; Mallilankaraman et al., 2012b; Patron et  
41 al., 2014; Plovanich et al., 2013).

42 The mtCU is a highly selective  $\text{Ca}^{2+}$  channel necessary for acute  $\text{Ca}^{2+}$  entry to the mitochondrial  
43 matrix (Baughman et al., 2011; De Stefani et al., 2011; Kirichok et al., 2004; Rizzuto et al.,  
44 2012). The mtCU consists of multiple subunits, namely the pore-forming component  
45 Mitochondrial Calcium Uniporter (MCU) and its homolog, MCUB; the regulatory scaffolds MCU  
46 Regulator 1 (MCUR1) and Essential MCU Regulator Element (EMRE); and the  $\text{Ca}^{2+}$  sensors

47 Mitochondrial Calcium Uptake proteins 1, 2, and 3 (MICU1, MICU2 and MICU3) (Baughman et  
48 al., 2011; De Stefani et al., 2011; Mallilankaraman et al., 2012a; Perocchi et al., 2010; Plovanich  
49 et al., 2013; Raffaello et al., 2013; Sancak et al., 2013; Tomar et al., 2016). MICU1 is essential  
50 to mtCU regulation, by directly binding MCU and EMRE and its expression correlates with  
51 tissue-dependent differences in mitochondrial calcium uptake (Csordas et al., 2013;  
52 Mallilankaraman et al., 2012b; Paillard et al., 2018; Patron et al., 2014; Perocchi et al., 2010;  
53 Phillips et al., 2019; Plovanich et al., 2013; Sancak et al., 2013; Xing et al., 2019).

54 Loss-of-function mutations in *MICU1* induce proximal myopathy, learning difficulties, movement  
55 disorder, fatigue, and lethargy in humans (Lewis-Smith et al., 2016; Logan et al., 2014) and  
56 deletion of *Micu1* in mouse models causes perinatal lethality (Antony et al., 2016; Liu et al.,  
57 2016). Recently, genetic mutants were generated to characterize mtCU regulation in *Drosophila*  
58 (Tufi et al., 2019). Intriguingly, Tufi et al. reported that a *MICU1* loss-of-function mutation  
59 resulted in *Drosophila* lethality, which could not be rescued by a concurrent *MCU* loss-of-  
60 function mutation that completely ablated mitochondrial  $\text{Ca}^{2+}$  ( $_{\text{m}}\text{Ca}^{2+}$ ) uptake and subsequent  
61 mitochondrial permeability transition pore opening (Tufi et al., 2019). This observation suggests  
62 that the lethal phenotype of MICU1-null flies was not solely a result of aberrant mtCU-dependent  
63  $\text{Ca}^{2+}$  uptake. This raises the possibility that MICU1 has mtCU-independent functions, which are  
64 vital for mitochondrial function and survival. Indeed, MICU1 knockout models show distinct  
65 abnormalities in mitochondrial ultrastructure that are not observed in any other mtCU knockout  
66 models (Bick et al., 2017; Liu et al., 2016; Luongo et al., 2015; Tomar et al., 2016). Additionally,  
67 MICU1 protein is reported to have high mobility within the IMM as compared to the MCU  
68 (Hoffman et al., 2013), suggesting that MICU1 could be associated with other complexes in the  
69 mitochondria. These observations led us to hypothesize that MICU1 regulates other essential  
70 mitochondrial processes beyond calcium uptake.

71 To discover mtCU-independent functions of the MICU1, we utilized a proximity-based  
72 biotinylation approach by generating a MICU1-BioID2 fusion protein. BioID2 is a recently  
73 developed, highly-efficient promiscuous biotin ligase which enables the detection of protein-  
74 protein interactions in living cells (Kim et al., 2016). We reconstituted *MICU1*<sup>-/-</sup> cells with MICU1-  
75 BioID2-HA to avoid aberrant localization associated with overexpression to characterize the  
76 entire MICU1 interactome. We also expressed MICU1-BioID2-HA in *MCU*<sup>-/-</sup> cells to define  
77 mtCU-independent interactions. Through a comparative analysis of mass-spectrometry, we  
78 identified proteins whose interaction with MICU1 was unaffected by the loss of MCU. Here, we  
79 report that MICU1 directly interacts with the Mitochondrial Contact Site and Cristae Organizing  
80 System (MICOS) components MIC60, and CHCHD2 in an MCU-independent manner. Our  
81 results suggest that MICU1 confers calcium sensing to the MICOS for cell signaling-dependent  
82 changes in cristae structure and function.

## 83 **Results and Discussion**

### 84 **Observation of MICU1 localization independent of the mtCU**

85 To define the mtCU-independent molecular functions of the MICU1, we first utilized size  
86 exclusion chromatography to characterize the native organization of MICU1-containing protein  
87 complexes. Total cell lysates prepared from HEK293T *MCU*<sup>+/+</sup> and *MCU*<sup>-/-</sup> cells were fractioned  
88 in non-reducing conditions by Fast Protein Liquid Chromatography (FPLC). FPLC fractions  
89 ranging from ~10kDa to ~900kDa were collected, concentrated and examined for the MICU1  
90 protein complexes using reducing SDS-PAGE and Western blotting (Figure 1A, 1B). MICU1  
91 forms distinct high-molecular weight (MW) protein complexes ranging from ~200 kDa to ~700  
92 kDa (Figure 1A, 1B). Intriguingly, the loss of MCU does not have a substantial effect on the  
93 overall distribution of MICU1-containing high-molecular weight (MW) protein complexes (Figure  
94 1A, 1B). Next, we examined mitochondrial sub-localization of MCU and MICU1 by  
95 immunofluorescent detection of native MCU and FLAG-tagged MICU1 in *Micu1*<sup>-/-</sup> mouse

96 embryonic fibroblasts (MEFs) to enable accurate detection of MICU1 and avoid aberrant  
97 localization associated with overexpression (Figure 1C). The deletion of MICU1 in MEFs was  
98 confirmed by Western blotting (Figure S1A). Line-scan analysis of the mitochondrial network  
99 clearly shows that MICU1 co-localizes with MCU, but also distributes to sub-mitochondrial  
100 regions lacking MCU (Figure 1C, 1D). These results suggest that MICU1 is present in  
101 mitochondrial protein complexes where the mtCU is absent.

102 Next, we characterized the mtCU-independent interactome of MICU1. We generated a MICU1-  
103 BioID2-HA fusion protein to enable the biotinylation of interactors (<10nm) in *MCU<sup>+/+</sup>* and *MCU<sup>-/-</sup>*  
104 cells to distinguish the mtCU-dependent vs. -independent MICU1 interactomes (Figure 1E).  
105 Expression, biotin ligase activity, sub-mitochondrial localization and reconstitution of  $mCa^{2+}$   
106 uptake regulation of MICU1-BioID2-HA fusion protein was confirmed in *MICU1<sup>-/-</sup>* cells  
107 expressing the MICU1-BioID2-HA fusion protein (Figure 1F, 1G, S1B). These data show that  
108 our fusion construct was properly localized and that mtCU-dependent calcium uptake was not  
109 altered in our discovery system. Next, we expressed the MICU1-BioID2 or BioID2 control in  
110 HEK293T *MICU1<sup>-/-</sup>* cells (hereafter *MCU<sup>+/+</sup>*) and HEK293T *MCU<sup>-/-</sup>* cells (hereafter *MCU<sup>-/-</sup>*)  
111 (Figure 1H). Biotinylation of proteins proximal to MICU1-BioID2 was induced by culturing cells in  
112 presence of biotin (50 $\mu$ M) for 16h (Figure 1H). MICU1-BioID2-HA protein expression and biotin  
113 ligase activity were confirmed via Western blotting (Figure 1H). Next, biotinylated proteins were  
114 purified from cell lysates using streptavidin-conjugated magnetic beads. Peptides were  
115 generated from the purified biotinylated proteins by tryptic digestion, and LC-MS was performed  
116 (Kim et al., 2016). Comparative analysis of MICU1 proximal proteins identified in *MCU<sup>+/+</sup>* vs.  
117 *MCU<sup>-/-</sup>* cells was performed (Figure 1I). The MICOS components MIC60, CHCHD3, CHCHD2,  
118 APOO, and APOOL emerged as 'hits' from a single multiprotein complex present at the inner  
119 mitochondrial membrane (IMM), and proximity to MICU1 was unaltered in *MCU<sup>-/-</sup>* cells (Figure  
120 1I, Table S1).

121 **MICU1 directly interacts with MIC60 and CHCHD2 in the MICOS complex**

122 The three core MICOS components along with OPA1, which is also involved in cristae  
123 organization, emerged as MICU1 proximal proteins in our proteomic screen (Figure 1I, Table  
124 S1). However, the loss of MCU results in loss of the MICU1:OPA1 interaction, while the MICU1  
125 interaction with the core MICOS components is preserved (Figure 1I, Table S1). This  
126 observation suggests that MICU1 could be an integral component of the MICOS complex and  
127 involved in mitochondrial cristae organization, independent of the mtCU and mitochondrial  
128 calcium uptake. To assess if MICU1 directly binds MIC60, CHCHD2, and CHCHD3 we co-  
129 expressed MIC60-FLAG, CHCHD2-FLAG, or CHCHD3-FLAG with MICU1-HA and 48h post-  
130 transfection, we performed immunoprecipitation (IP) with FLAG-conjugated magnetic beads.  
131 IP'd products were analyzed by SDS-PAGE and Western blotting for HA immunoreactivity, to  
132 detect MICU1, and FLAG expression, to detect MICOS components (Figure 2A). To control for  
133 level of expression we blotted for FLAG-tagged MIC60 (~90kDa), CHCHD2 (~16kDa), and  
134 CHCHD3 (~26kDa) and HA-tagged MICU1 (~55kDa) (Figure 2A). All were expressed to similar  
135 degrees, but only MIC60 and CHCHD2 pulled-down with MICU1 (Figure 2A). We validated this  
136 result by reverse IPs and confirmed the interaction of MICU1-FLAG with endogenous MIC60  
137 and CHCHD2, but not with CHCHD3 (Figure S2A). This suggests that MICU1 may directly  
138 interact with MIC60 and CHCHD2, but not with CHCHD3 and that its biotinylation in our  
139 discovery assay was likely due to its general proximity to MICU1. To substantiate the MICU1  
140 interaction with MIC60 and CHCHD2 we performed co-immunofluorescence labeling and  
141 imaged to examine sub-mitochondrial localization (Figure 2B, 2C, 2D, 2E). The line-scan profile  
142 shows distinct pixels with spectral overlap of MICU1 with MIC60, and MICU1 with CHCHD2  
143 (Figure 2C, 2E). Together, these data suggest that MICU1 directly interacts with the core  
144 MICOS components.

145 To further characterize the functional relevance of MICU1 interaction with MICOS components,  
146 we performed FPLC to fractionate the high-MW MICOS complex in WT, *MCU*<sup>-/-</sup> and *MICU1*<sup>-/-</sup>  
147 cells. Immunoblots of 19 fractions ranging from ~10kDa to ~900kDa were probed for MIC60,  
148 CHCHD2 and CHCHD3 expression; all showed robust immunoreactivity in native protein  
149 complexes ranging from ~400-700 kD (Figure 2F- 2I, S2B, S2C). Interestingly, genetic deletion  
150 of *MCU* had no effect on the overall size or fraction distribution of the multi-subunit MICOS  
151 complex (Figure 2F- 2I, S2B, S2C). However, the loss of MICU1 expression resulted in a  
152 rightward shift, decrease in overall MW, of MIC60, CHCHD2, and CHCHD3 containing  
153 complexes (Figure 2F- 2I, S2B, S2C) suggesting that MICU1 may play an integral role in  
154 MICOS complex assembly or stability.

155 **MICU1 is essential for the maintenance of mitochondrial ultrastructure and cristae**  
156 **organization**

157 The MICOS is essential for maintenance of mitochondrial membrane topology and bottleneck  
158 formation (Friedman et al., 2015; Harner et al., 2011; Tarasenko et al., 2017; van der Laan et  
159 al., 2016). The MICOS is localized at the intersection of the IMM and OMM, which results in the  
160 formation of membrane contact sites at cristae junctions (Friedman et al., 2015; Harner et al.,  
161 2011; Tarasenko et al., 2017; van der Laan et al., 2016). Ca<sup>2+</sup> is reported to modulate the  
162 cristae structure (Gottschalk et al., 2018; Greenawalt et al., 1964), however, no Ca<sup>2+</sup>-sensing  
163 protein has yet been identified as an essential component of the MICOS. To discern if MICU1  
164 serves as a conduit for calcium-dependent regulation of the MICOS, we examined if genetic  
165 loss of *MICU1* had any effect on mitochondrial ultrastructure and cristae junctions. In agreement  
166 with previous reports, transmission electron microscopy (TEM) revealed gross changes in  
167 mitochondrial ultrastructure of cells lacking MICU1 (Figure 3A- 3D). Careful quantitative analysis  
168 of TEM images showed that mitochondrial perimeter, mitochondrial Feret diameter (the distance  
169 between the two parallel planes restricting the object perpendicular to that direction), and aspect



170 ratio are significantly reduced in *MICU1*<sup>-/-</sup> cells (Figure 3B- 3D). This suggests that mitochondria  
171 are less filamentous in *MICU1*<sup>-/-</sup> cells. Next, we analyzed the inter-cristae junction (distance  
172 between cristae) and the cristae junction width (distance between IMM of the same cristae) in  
173 WT and *MICU1*<sup>-/-</sup> cells. The inter-cristae junction distance is reported to be directly proportional  
174 to cristae density. *MICU1*<sup>-/-</sup> cells displayed a significant increase in both the inter-cristae junction  
175 distance and cristae junction width, as compared to WT cells (Figure 3E, 3F).

176 The bottleneck structure of cristae is essential to the maintenance of the mitochondrial  
177 respiratory chain complexes (Friedman et al., 2015; van der Laan et al., 2016). Disorganization  
178 and cristae remodeling is associated with the release of cytochrome c from bottlenecks, which  
179 subsequently induces cell death signaling pathways (Scorrano et al., 2002). To further define  
180 the role of MICU1 in cristae regulation, we monitored tBid-induced cytochrome c release in  
181 primary *Micu1*<sup>-/-</sup> mouse embryonic fibroblasts (MEFs). The loss of MICU1 resulted in increased  
182 basal cytochrome c release and this was potentiated after tBID treatment (Figure 3G, 3H). To  
183 rule out possible indirect effects of MICU1 regulation of mtCU-Ca<sup>2+</sup> uptake on cristae structure,  
184 we examined mCa<sup>2+</sup> uptake in *Chchd2*<sup>-/-</sup> MEFs. CHCHD2 was previously identified as a core  
185 MICOS component and its genetic deletion results in abnormal cristae organization (Meng et al.,  
186 2017). *WT* and *Chchd2*<sup>-/-</sup> MEFs were permeabilized with digitonin in the presence of  
187 thapsigargin to monitor mCa<sup>2+</sup> uptake independent of plasma membrane and ER Ca<sup>2+</sup> transport  
188 using ratiometric Ca<sup>2+</sup> sensor. *Chchd2*<sup>-/-</sup> cells showed no change in mCa<sup>2+</sup> uptake suggesting  
189 that altered cristae structure alone is insufficient to impact mtCU-dependent mCa<sup>2+</sup> uptake  
190 (Figure S3A, S3B). Further, we found that loss of CHCHD2 had no effect on mitochondrial  
191 calcium efflux (rate of Ca<sup>2+</sup> exiting the matrix after Ru360 blockade of MCU; Figure S3A, S3C).  
192 We also examined the high-MW/functional mtCU complex in *Chchd2*<sup>-/-</sup> MEFs by FPLC-based  
193 protein fractionation and observed no change in MCU distribution (Figure S3D, S3E). These

194 observations suggest that altered cristae structure alone does not have a significant impact on  
195 mtCU assembly or  $mCa^{2+}$  dynamics.

196 In summary, we characterized the MICU1 interactome and identified a distinct involvement in  
197 cristae organization independent of the mtCU and mitochondrial calcium uptake. Our study  
198 reveals a direct interaction between MICU1 and core MICOS components and shows that this  
199 interaction is essential to form the functional MICOS complex. This mechanism could explain  
200 the lethal phenotype observed in MICU1 knockout models (Antony et al., 2016; Liu et al., 2016;  
201 Tufi et al., 2019), as our results suggest that loss of MICU1 could induce both necrotic, as well  
202 as apoptotic, death signaling events independent of matrix  $Ca^{2+}$  overload. Our results also  
203 highlight the need to reappraise the MICU1/mtCU literature as some of the reported phenotypes  
204 may be influenced by alterations in the function/structure of the MICOS, rather than dependent  
205 on changes in mitochondrial calcium uptake. Further research is needed to define the precise  
206 interaction of MICU1 with MICOS components to hopefully identify tools to enable the dissection  
207 of mtCU-dependent vs. independent functions in mitochondrial biology. In summary, the current  
208 study identified a novel role for MICU1 in regulating the cristae junction, independent of the  
209 mtCU, which is essential for mitochondrial physiology.

210 **Materials and Methods**

211 **Key resources table**

| Reagent type or resource | Designation                                                      | Source or reference   | Identifiers                | Additional information             |
|--------------------------|------------------------------------------------------------------|-----------------------|----------------------------|------------------------------------|
| Cell lines               | HEK293T WT                                                       | (Sancak et al., 2013) |                            |                                    |
|                          | HEK293T <i>MCU</i> <sup>-/-</sup>                                | (Sancak et al., 2013) |                            |                                    |
|                          | HEK293T <i>MICU1</i> <sup>-/-</sup>                              | (Sancak et al., 2013) |                            |                                    |
|                          | MEF <i>Micu1</i> <sup>+/+</sup>                                  | This study            |                            |                                    |
|                          | MEF <i>Micu1</i> <sup>-/-</sup>                                  | This study            |                            |                                    |
|                          | MEF <i>Chchd2</i> <sup>+/+</sup>                                 | (Meng et al., 2017)   |                            |                                    |
|                          | MEF <i>Chchd2</i> <sup>-/-</sup>                                 | (Meng et al., 2017)   |                            |                                    |
|                          | Plasmids                                                         | MCS-BioID2-HA         | Addgene (Kim et al., 2016) | Cat# 74224                         |
| Start-BioID2-HA          |                                                                  | This study            |                            |                                    |
| MICU1-BioID2-HA          |                                                                  | This study            |                            |                                    |
| hMICU1-Myc-DDK           |                                                                  | OriGene Technologies  | Cat# RC200921              |                                    |
| MICU1-FLAG               |                                                                  | OriGene Technologies  | Cat# MR207652              |                                    |
| pCMV6-AC-HA              |                                                                  | OriGene Technologies  | Cat# PS100004              |                                    |
| MICU1-HA                 |                                                                  | This study            |                            |                                    |
| MIC60-FLAG               |                                                                  | OriGene Technologies  | Cat# MR216091              |                                    |
| CHCHD3-FLAG              |                                                                  | OriGene Technologies  | Cat# MR202692              |                                    |
| CHCHD2-FLAG              |                                                                  | OriGene Technologies  | Cat# MR223513              |                                    |
| Antibodies               | Anti-MIC60<br>IMMT Rabbit<br>Polyclonal Antibody<br>(10179-1-AP) | Proteintech           | Cat# 10179-1-<br>AP        | WB 1:1000<br>IF 1:200<br>PLA 1:200 |

|  |                                                    |                                  |                             |                                    |
|--|----------------------------------------------------|----------------------------------|-----------------------------|------------------------------------|
|  | Anti-CHCHD3<br>Rabbit Polyclonal<br>Antibody       | Proteintech                      | Cat# 25625-1-<br>AP         | WB 1:1000                          |
|  | Anti-CHCHD2 Rabbit<br>Polyclonal Antibody          | Proteintech                      | Cat# 19424-1-<br>AP         | WB 1:1000<br>IF 1:200<br>PLA 1:200 |
|  | Anti-MCU<br>Rabbit Polyclonal<br>Antibody          | Sigma-Aldrich                    | Cat#<br>HPA016480-<br>100UL | WB 1:1000<br>IF 1:200<br>PLA 1:200 |
|  | Monoclonal ANTI-<br>FLAG® M2 antibody              | Sigma-Aldrich                    | Cat# F1804-<br>1MG          | WB 1:2000<br>IF 1:200<br>PLA 1:200 |
|  | Anti-HA High Affinity,<br>from rat IgG1            | Sigma-Aldrich                    | Cat#<br>11867423001         | WB 1:3000                          |
|  | Anti-MICU1<br>Rabbit Polyclonal<br>Antibody        | In-house (Tomar et al.,<br>2016) |                             | WB 1:500                           |
|  | Anti-BioID2 Chicken<br>Polyclonal Antibody         | BioFront Technologies            | Cat# BID2-CP-<br>100        | WB 1:500                           |
|  | Cytochrome c<br>Antibody (A-8) Alexa<br>Fluor® 680 | Santa Cruz Biotechnology         | Cat# sc-13156<br>AF680      | WB 1:5000                          |
|  | IRDye 800CW<br>Streptavidin                        | LI-COR Biosciences               | Cat# 925-32230              | WB 1:10000                         |
|  | IRDye® 680RD Goat<br>anti-Mouse IgG (H +<br>L)     | LI-COR Biosciences               | Cat# 925-68070              | WB 1:10000                         |

|                |                                                                                           |                          |                |            |
|----------------|-------------------------------------------------------------------------------------------|--------------------------|----------------|------------|
|                | IRDye® 680RD Goat anti-Rat IgG (H + L)                                                    | LI-COR Biosciences       | Cat# 925-68076 | WB 1:10000 |
|                | IRDye® 680RD Goat anti-Rabbit IgG (H + L)                                                 | LI-COR Biosciences       | Cat# 926-68071 | WB 1:10000 |
|                | Goat Anti-Chicken IgY H&L (Alexa Fluor® 680)                                              | Abcam                    | Cat# ab175779  | WB 1:10000 |
|                | IR Dye Goat anti Rabbit 800CW                                                             | LI-COR Biosciences       | Cat# 926-32211 | WB 1:10000 |
|                | IRDye® 800CW Goat anti-Mouse IgG (H + L)                                                  | LI-COR Biosciences       | Cat# 926-32210 | WB 1:10000 |
|                | Donkey anti-Mouse IgG (H+L) Highly Cross-Adsorbed Secondary Antibody, Alexa Fluor 488     | Thermo Fisher Scientific | Cat# A-21202   | IF 1:500   |
|                | Goat anti-Rabbit IgG (H+L) Highly Cross-Adsorbed Secondary Antibody, Alexa Fluor Plus 647 | Thermo Fisher Scientific | Cat# A32733    | IF 1:500   |
| Magnetic Beads | ANTI-FLAG(R) M2 MAGNETIC BEADS                                                            | Sigma-Aldrich            | Cat# M8823-1ML |            |
|                | DYNAL MyOne Dynabeads                                                                     | Thermo Fisher Scientific | Cat# 65-001    |            |

|                         |                                                       |                                                                   |                   |                            |
|-------------------------|-------------------------------------------------------|-------------------------------------------------------------------|-------------------|----------------------------|
|                         | Streptavidin C1                                       |                                                                   |                   |                            |
| Commercial assay or kit | Duolink® In Situ Red Starter Kit Mouse/Rabbit         | Sigma-Aldrich                                                     | Cat# DUO92101-1KT | PLA                        |
|                         | Recombinant Human BID (Caspase-8-cleaved) Protein, CF | R&D Systems                                                       | Cat# 882-B8-050   | Cytochrome c release assay |
| Staining reagents       | Fura-FF                                               | AAT Bioquest                                                      | Cat# 21028        | Ca <sup>2+</sup> detection |
|                         | Hoechst 33342                                         | Thermo Fisher Scientific                                          | Cat# 62249        | Nucleus Staining           |
| Software, algorithm     | GraphPad Prism                                        | <a href="https://www.graphpad.com/">https://www.graphpad.com/</a> |                   |                            |
|                         | Image J Fiji                                          | <a href="https://imagej.net/Fiji">https://imagej.net/Fiji</a>     |                   |                            |
|                         | Zeiss Zen                                             | <a href="https://www.zeiss.com">https://www.zeiss.com</a>         |                   |                            |

## 212 Plasmids Construction

213 To generate Start-BioID2-HA plasmid, BioID2 was PCR-amplified from the MCS-BioID2-HA  
214 plasmid using primers designed to introduce an ATG start codon immediately downstream of  
215 the BamHI restriction site of the MCS. The PCR product was cloned via BamHI and HindIII into  
216 the MCS-BioID2-HA plasmid (Addgene #74224). To generate the MICU1-BioID2-HA, MICU1  
217 was PCR amplified from the hMICU1-Myc-DDK plasmid using primers to introduce a 5' AgeI  
218 and a 3' BamHI restriction site. The PCR product was cloned via AgeI and BamHI into the MCS-  
219 BioID2-HA plasmid (Addgene #74224). MICU1-HA plasmid was generated by cleaving the  
220 MICU1 fragment from the MICU1-FLAG plasmid using the SgfI-MluI restriction sites and  
221 inserted at the same sites in pCMV6-AC-HA vector. All plasmids were confirmed using the  
222 restriction digestion and DNA sequencing.

223 **Cell culture**

224 HEK293T WT, HEK293T *MCU*<sup>-/-</sup> and HEK293T *MICU1*<sup>-/-</sup> cells were grown in Dulbecco's  
225 Modification of Eagle's Medium with 4.5 g/L glucose, L-glut, and Na Pyr medium (Corning  
226 Cellgro, Cat#10-013-CV) supplemented with 10% fetal bovine serum (Peak Serum, Cat#PS-  
227 FB3), 1% penicillin/streptomycin (Sigma-Aldrich, Cat# P0781-100ML) at 37°C in the presence of  
228 5% CO<sub>2</sub>. Mouse embryonic fibroblasts isolated from the *Micu1*<sup>fl/fl</sup> mouse were immortalized by  
229 infecting the cells with SV40 large T antigen-expressing adenovirus. The immortalized *Micu1*<sup>fl/fl</sup>  
230 MEFs serve as *Micu1*<sup>+/+</sup> control cells. *Micu1*<sup>-/-</sup> MEFs were generated by transducing the  
231 *Micu1*<sup>+/+</sup> MEFs with adenovirus encoding Cre-recombinase (Ad-Cre). MEFs were grown in  
232 Dulbecco's Modification of Eagle's Medium with 4.5 g/L glucose, L-glut, and Na Pyr medium  
233 (Corning Cellgro, Cat#10-013-CV) supplemented with 10% fetal bovine serum (Peak Serum,  
234 Cat#PS-FB3), 1% Gibco® MEM Non-Essential Amino Acids (Thermo Fisher Scientific, Cat# 11-  
235 140-050), 1% penicillin/streptomycin (Sigma-Aldrich, Cat# P0781-100ML), at 37°C in the  
236 presence of 5% CO<sub>2</sub>. The *Chchd2*<sup>+/+</sup> and *Chchd2*<sup>-/-</sup> MEFs were cultured as described earlier  
237 (Meng et al., 2017). To exogenously express MICU1, MIC60, CHCHD3, and CHCHD2,  
238 HEK293T cells were transfected with the Fugene HD transfection reagent (Promega,  
239 Cat#E2311) as per manufacturer instruction. To generate the MEFs stably expressing MICU1-  
240 FLAG, immortalized WT MEFs were transfected with MICU1-FLAG plasmid (OriGene  
241 Technologies, Cat#MR207652) using the Fugene HD transfection reagent (Promega,  
242 Cat#E2311). 24h post-transfection, culture media was replaced with media supplemented with  
243 the 500 µg/mL G418 (Thermo Fisher Scientific, Cat#10131035). Fresh culture media  
244 supplemented with G418 was replaced at two-day interval, until all the dying cells were cleared.  
245 After incubation for two weeks, the cells were maintained in DMEM supplemented with 200  
246 µg/mL G418. The protein expression was validated by western blotting and  
247 immunofluorescence.

## 248 **Immunoblotting**

249 Cells were harvested, washed with ice-cold PBS and lysed in 1X RIPA lysis buffer (EMD  
250 Millipore, Cat#20-188) supplemented with SIGMAFAST™ Protease Inhibitor Cocktail (Sigma-  
251 Aldrich, Cat#S8830). Protein concentrations were determined by Pierce 660nm Protein Assay  
252 (Thermo Fisher Scientific, Cat#22660) and equal ug of protein were separated by  
253 electrophoresis on NuPAGE 4-12% Bis-Tris protein gel (Thermo Fisher Scientific,  
254 Cat#WG1402BOX), in denaturing conditions. Protein was electroblotted on PVDF membrane  
255 (EMD Millipore, Cat#IPFL00010). Following the transfer, the membrane was incubated in  
256 Blocking Buffer (Rockland, Cat#MB-070) for 1h at room temperature, followed by overnight  
257 incubation with specific primary antibody at 4°C. After incubation the membrane was washed  
258 with TBS-T (TBS containing 0.1% Tween 20) 3 times for 10 min each and then incubated with  
259 specific secondary antibody for 1h at room temperature. The membrane was similarly washed 3  
260 times with TBS-T and then imaged on an LI-COR Odyssey system.

## 261 **Sub-mitochondrial protein localization assay**

262 Mitochondria were isolated as described earlier (Tomar et al., 2015). Briefly, cells were grown in  
263 150 mm<sup>2</sup> culture dishes, washed with PBS, and resuspended in isotonic mitochondria isolation  
264 buffer (10 mM HEPES, pH 7.5, containing 200 mM mannitol, 70 mM sucrose, and 1 mM EGTA).  
265 The cell suspension was homogenized by Dounce homogenizer, centrifuged at 500 g for 10 min  
266 at 4°C. Supernatant was collected and centrifuged at 12,000 g for 15 min at 4°C to obtain crude  
267 mitochondrial pellet. The pellet was resuspended in mitochondria isolation buffer and washed 2  
268 times using the centrifuge at 12,000 g for 15 min at 4°C. The mitochondrial pellet was  
269 resuspended in intracellular buffer (120 mM KCl, 10 mM NaCl, 1 mM KH<sub>2</sub>PO<sub>4</sub>, 20 mM HEPES-  
270 Tris, pH 7.2) and permeabilized with varying digitonin concentrations and digested with  
271 proteinase K (10 µg/mL) for 10min at room temperature. Proteinase K digestion was stopped by  
272 adding SIGMAFAST™ Protease Inhibitor Cocktail (Sigma-Aldrich, Cat#S8830) and 2X SDS-



273 loading dye and heating the samples at 95°C for 10min. The immunoblotting was performed  
274 using specified antibodies.

### 275 **Biotinylation and mass spectrometry analysis**

276 To induce BioID2-mediated protein biotinylation, cells were cultured with media supplemented  
277 with 50 µM biotin for 16h. Cells were collected, washed with PBS 2 times, and lysed in BioID2  
278 lysis buffer (50 mM Tris, pH 7.4, 500 mM NaCl, 2% Triton X-100, 0.4% SDS, 1 mM  
279 dithiothreitol) supplemented with SIGMAFAST™ Protease Inhibitor Cocktail (Sigma-Aldrich,  
280 Cat#S8830). The cell suspension was sonicated for 2 times each for 1 min at an output level of  
281 40 (Vibra-Cell, Sonics). An equal volume of 50 mM Tris, pH 7.4, was added and the suspension  
282 was cleared using centrifugation at 16,500 g for 20 min. The supernatant was used for  
283 immunoblotting or Streptavidin based pull-down using MyOne Dynabeads Streptavidin C1.  
284 Mass spectroscopy for identification of the biotinylated proteins was performed as described  
285 earlier (Kim et al., 2016).

### 286 **FPLC and protein fractionation**

287 Size-exclusion gel filtration was used to separate the high-molecular-weight protein complexes  
288 using the fast protein liquid chromatography (ÄKTA Pure FPLC; GE Healthcare) (Tomar et al.,  
289 2016). The PBS-equilibrated Superdex 200 10/300 column (GE Healthcare, Cat#17517501)  
290 was calibrated with a gel filtration calibration standard (Bio-Rad, Cat#1511901). The cleared cell  
291 lysates were directly loaded onto FPLC and fractionated at a flow rate of 0.5 mL/min. Protein  
292 fractions were collected in 0.5 mL PBS, concentrated to 50µL volume using an AMICON Ultra-  
293 0.5 Centrifugal Filter Devices (with a 3,000 kD cutoff) (EMD Millipore, Cat#UFC500396).  
294 Concentrated fractions were then immunoblotted using specific antibodies.

### 295 **Co-immunoprecipitation**

296 To study protein-protein interactions, immunoprecipitation experiments were performed as  
297 described earlier (Tomar et al., 2016). Briefly, HEK293T cells were co-transfected with the  
298 indicated plasmids. After 36h of transfection, cells were harvested, washed with ice-cold PBS  
299 and lysed in 1X RIPA lysis buffer (EMD Millipore, Cat#20-188) supplemented with  
300 SIGMAFAST™ Protease Inhibitor Cocktail (Sigma-Aldrich, Cat#S8830). Protein concentrations  
301 were determined by Pierce 660nm Protein Assay (Thermo Fisher Scientific, Cat#22660) and  
302 equal proteins amounts were used for co-immunoprecipitation. Cleared cell lysate was  
303 incubated with Anti-FLAG M2 Magnetic Beads (Sigma-Aldrich) on a roller shaker overnight at  
304 4°C. Beads were washed 3 times with RIPA buffer and 2 times with TBS-T, resuspended in 2X  
305 SDS-PAGE sample buffers, and then immunoblotting was performed using specific antibodies.

### 306 **Co-immunofluorescence**

307 The mitochondrial localization of mtCU, MICOS, and MICU1 was also analyzed by  
308 immunofluorescence using standard protocol (Tomar et al., 2015). Briefly, the MEFs stably  
309 expressing MICU1-FLAG were grown on collagen-coated 35-mm dishes. Cells were washed  
310 with PBS, fixed for 20min with 4% paraformaldehyde, then permeabilized for 15min by 0.15%  
311 Triton X-100. Permeabilized cells were blocked using 10% BSA for 45min at room temperature  
312 and incubated with primary antibodies overnight at 4°C. After incubation, cells were washed 3  
313 times with blocking reagent and incubated with Alexa Fluor-tagged secondary antibodies for 1h  
314 at room temperature. Cells were washed 3 times with PBS, and confocal images were obtained  
315 using an LSM 510 META Laser Scanning Microscope (Carl Zeiss, Inc.) at 488- and 647-nm  
316 excitations using a 63x oil objective. Images were analyzed and quantitated using ZEN 2010  
317 software (Carl Zeiss, Inc.), and Image J Fiji.

### 318 **Proximity ligation assay**

319 Proximity ligation assay (PLA) was used to detect *in situ* MICU1: MICOS interactions. MICU1-  
320 FLAG expressing MEFs were seeded on collagen-coated 35-mm dishes. Cells were washed  
321 with PBS, fixed for 20min with 4% paraformaldehyde, then permeabilized with 0.15% Triton X-  
322 100. PLA was performed as per manufacturer's instructions (Sigma-Aldrich, Duolink® In Situ  
323 Red Mouse/Rabbit Assay). Images were acquired using an LSM 510 META Laser Scanning  
324 Microscope (Carl Zeiss, Inc.) using a 63x oil objective.

### 325 **Transmission electron microscopy**

326 Transmission electron microscopy (TEM) was utilized to evaluate mitochondrial ultrastructure  
327 and cristae organization. HEK293T cells of the indicated genotypes were grown to 80%  
328 confluency on 25 mm diameter Thermanox® Cover Slips (Thermo Fisher Scientific,  
329 Cat#174985PK) in 6-well plates. Culture media was removed, and cells were fixed with freshly  
330 prepared TEM fixation buffer (2% glutaraldehyde, 2% paraformaldehyde in 0.1M sodium  
331 cacodylate buffer) for 30 min at room temperature. Fixative was replaced with 0.1M sodium  
332 cacodylate buffer, and then samples were processed for TEM imaging. Images were obtained  
333 using Zeiss LIBRA120 TEM equipped with Gatan UltraScan, 1000 2k x 2k CCD EFTEM, energy  
334 filtering. Images were analyzed and quantitated Image J Fiji.

### 335 **Cytochrome c release assay**

336 The cytochrome c release assay was performed as described earlier (Tomar et al., 2015) with  
337 slight modifications. Briefly, MEFs of indicated genotypes were grown in 150mm<sup>2</sup> culture dishes.  
338 Cells were washed with ice-cold PBS, pH 7.4. An equal number of cells were suspended in  
339 intracellular buffer (120 mM KCl, 10 mM NaCl, 1 mM KH<sub>2</sub>PO<sub>4</sub>, 20 mM HEPES-Tris, pH 7.2)  
340 supplemented with SIGMAFAST™ Protease Inhibitor Cocktail (Sigma-Aldrich, Cat#S8830), and  
341 permeabilized with digitonin (80 µg/mL) for 5 min at room temperature. The cytochrome c  
342 release was induced by adding tBid (20nM) and incubating the cell suspension at 30°C for

343 30 min. Cell homogenates were spun at 16,500 g, 4°C for 10 min, and the supernatant  
344 (cytosolic fraction) was removed. Pellets were lysed 1XRIPA buffer and centrifuged at 16,500 g,  
345 4°C for 10 min to obtain the total cell lysate. Both total cell lysate and cytosolic fractions were  
346 immunoblotted using the cytochrome c antibody.

### 347 **mCa<sup>2+</sup> flux analysis**

348 mCa<sup>2+</sup> flux was analyzed as described earlier (Luongo et al., 2015; Tomar et al., 2016). Briefly,  
349 cells were washed in Ca<sup>2+</sup>-free DPBS (Thermo Fisher Scientific, Cat#14190235). An equal  
350 number of cells (7x10<sup>6</sup> cells) were resuspended and permeabilized with 40 µg/ml digitonin in 1.5  
351 ml of intracellular medium (120 mM KCl, 10 mM NaCl, 1 mM KH<sub>2</sub>PO<sub>4</sub>, 20 mM HEPES-Tris, pH  
352 7.2), containing 2 µM thapsigargin to block the SERCA pump, and supplemented with 5 mM  
353 succinate. Fura-FF (1 µM) was loaded to the cell suspension, and fluorescence was monitored in  
354 a multiwavelength excitation dual-wavelength emission fluorimeter (Delta RAM, PTI).  
355 Extramitochondrial Ca<sup>2+</sup> is shown as the excitation ratio (340 nm/380 nm) of Fura-FF  
356 fluorescence. A Ca<sup>2+</sup> bolus, and then mitochondrial uncoupler, FCCP (2 µM), were added at the  
357 indicated time points (8, 9). All the experiments were performed at 37°C with constant stirring.

### 358 **Statistical analysis**

359 Results are presented as mean +/- standard error of the mean. Statistical analysis was  
360 performed using GraphPad PRISM 7.05 (Graph Pad Software). All experiments were repeated  
361 independently at least three times. Column analyses were performed using an unpaired, 2-tailed  
362 t-test (for 2 groups) with Welch's correction. For grouped analyses, 2-way ANOVA with Tukey  
363 post-hoc analysis was performed. *P* values less than 0.05 (95% confidence interval) were  
364 considered significant.

### 365 **Data availability.**

366 All relevant data are available from the authors.

367 **Acknowledgments**

368 The authors thanks to Trevor Tierney for technical and managerial assistance in the Elrod  
369 Laboratory.

370 **Sources of Funding**

371 NIH to J.W.E.: R01HL142271, R01HL136954, R01HL123966, P01HL134608-sub-5483; AHA to  
372 D.T.: 17POST33660251, 19CDA34490009.

373 **Author Contributions**

374 Conceptualization, D.T. and J.W.E.; Methodology, D.T., M.T., J.F.G., D.W.K., O.S., P.J., A.C.C.,  
375 and J.W.E.; Investigation, D.T., M.T., O.S., P.J., and J.W.E; Resources, D.T., J.F.G., D.W.K.,  
376 and J.W.E.; Writing – Original Draft, D.T. and J.W.E; Writing –Review & Editing, D.T., M.T.,  
377 J.F.G., P.J., and J.W.E.; Supervision, J.W.E.; Funding Acquisition, D.T., and J.W.E.

378 **Competing Interests**

379 The authors declare no competing interests.

380 **Author Information**

381 Correspondence and requests for materials should be addressed to J.W.E. (elrod@temple.edu).

## 382 References

- 383 Antony, A.N., Paillard, M., Moffat, C., Juskeviciute, E., Correnti, J., Bolon, B., Rubin, E.,  
384 Csordas, G., Seifert, E.L., Hoek, J.B., *et al.* (2016). MICU1 regulation of mitochondrial Ca(2+)  
385 uptake dictates survival and tissue regeneration. *Nat Commun* 7, 10955.
- 386 Bagur, R., and Hajnoczky, G. (2017). Intracellular Ca(2+) Sensing: Its Role in Calcium  
387 Homeostasis and Signaling. *Mol Cell* 66, 780-788.
- 388 Baughman, J.M., Perocchi, F., Girgis, H.S., Plovanich, M., Belcher-Timme, C.A., Sancak, Y.,  
389 Bao, X.R., Strittmatter, L., Goldberger, O., Bogorad, R.L., *et al.* (2011). Integrative genomics  
390 identifies MCU as an essential component of the mitochondrial calcium uniporter. *Nature* 476,  
391 341-345.
- 392 Bick, A.G., Wakimoto, H., Kamer, K.J., Sancak, Y., Goldberger, O., Axelsson, A., DeLaughter,  
393 D.M., Gorham, J.M., Mootha, V.K., Seidman, J.G., *et al.* (2017). Cardiovascular homeostasis  
394 dependence on MICU2, a regulatory subunit of the mitochondrial calcium uniporter. *Proc Natl*  
395 *Acad Sci U S A* 114, E9096-E9104.
- 396 Carafoli, E. (2002). Calcium signaling: a tale for all seasons. *Proc Natl Acad Sci U S A* 99, 1115-  
397 1122.
- 398 Carafoli, E. (2003). The calcium-signalling saga: tap water and protein crystals. *Nat Rev Mol*  
399 *Cell Biol* 4, 326-332.
- 400 Csordas, G., Golenar, T., Seifert, E.L., Kamer, K.J., Sancak, Y., Perocchi, F., Moffat, C.,  
401 Weaver, D., de la Fuente Perez, S., Bogorad, R., *et al.* (2013). MICU1 controls both the  
402 threshold and cooperative activation of the mitochondrial Ca(2+)(+) uniporter. *Cell Metab* 17,  
403 976-987.
- 404 De Stefani, D., Raffaello, A., Teardo, E., Szabo, I., and Rizzuto, R. (2011). A forty-kilodalton  
405 protein of the inner membrane is the mitochondrial calcium uniporter. *Nature* 476, 336-340.
- 406 Fransson, A., Ruusala, A., and Aspenstrom, P. (2003). Atypical Rho GTPases have roles in  
407 mitochondrial homeostasis and apoptosis. *J Biol Chem* 278, 6495-6502.
- 408 Frederick, R.L., McCaffery, J.M., Cunningham, K.W., Okamoto, K., and Shaw, J.M. (2004).  
409 Yeast Miro GTPase, Gem1p, regulates mitochondrial morphology via a novel pathway. *J Cell*  
410 *Biol* 167, 87-98.
- 411 Friedman, J.R., Mourier, A., Yamada, J., McCaffery, J.M., and Nunnari, J. (2015). MICOS  
412 coordinates with respiratory complexes and lipids to establish mitochondrial inner membrane  
413 architecture. *Elife* 4.
- 414 Gottschalk, B., Klec, C., Waldeck-Weiermair, M., Malli, R., and Graier, W.F. (2018). Intracellular  
415 Ca(2+) release decelerates mitochondrial cristae dynamics within the junctions to the  
416 endoplasmic reticulum. *Pflugers Arch* 470, 1193-1203.

- 417 Greenawalt, J.W., Rossi, C.S., and Lehninger, A.L. (1964). Effect of Active Accumulation of  
418 Calcium and Phosphate Ions on the Structure of Rat Liver Mitochondria. *J Cell Biol* 23, 21-38.
- 419 Harner, M., Korner, C., Walther, D., Mokranjac, D., Kaesmacher, J., Welsch, U., Griffith, J.,  
420 Mann, M., Reggiori, F., and Neupert, W. (2011). The mitochondrial contact site complex, a  
421 determinant of mitochondrial architecture. *EMBO J* 30, 4356-4370.
- 422 Hoffman, N.E., Chandramoorthy, H.C., Shamugapriya, S., Zhang, X., Rajan, S.,  
423 Mallilankaraman, K., Gandhirajan, R.K., Vagnozzi, R.J., Ferrer, L.M., Sreekrishnanilayam, K., *et*  
424 *al.* (2013). MICU1 motifs define mitochondrial calcium uniporter binding and activity. *Cell Rep* 5,  
425 1576-1588.
- 426 Kim, D.I., Jensen, S.C., Noble, K.A., Kc, B., Roux, K.H., Motamedchaboki, K., and Roux, K.J.  
427 (2016). An improved smaller biotin ligase for BioID proximity labeling. *Mol Biol Cell* 27, 1188-  
428 1196.
- 429 Kirichok, Y., Krapivinsky, G., and Clapham, D.E. (2004). The mitochondrial calcium uniporter is  
430 a highly selective ion channel. *Nature* 427, 360-364.
- 431 Lewis-Smith, D., Kamer, K.J., Griffin, H., Childs, A.M., Pysden, K., Titov, D., Duff, J., Pyle, A.,  
432 Taylor, R.W., Yu-Wai-Man, P., *et al.* (2016). Homozygous deletion in MICU1 presenting with  
433 fatigue and lethargy in childhood. *Neurol Genet* 2, e59.
- 434 Liu, J.C., Liu, J., Holmstrom, K.M., Menazza, S., Parks, R.J., Fergusson, M.M., Yu, Z.X.,  
435 Springer, D.A., Halsey, C., Liu, C., *et al.* (2016). MICU1 Serves as a Molecular Gatekeeper to  
436 Prevent In Vivo Mitochondrial Calcium Overload. *Cell Rep* 16, 1561-1573.
- 437 Logan, C.V., Szabadkai, G., Sharpe, J.A., Parry, D.A., Torelli, S., Childs, A.M., Kriek, M.,  
438 Phadke, R., Johnson, C.A., Roberts, N.Y., *et al.* (2014). Loss-of-function mutations in MICU1  
439 cause a brain and muscle disorder linked to primary alterations in mitochondrial calcium  
440 signaling. *Nat Genet* 46, 188-193.
- 441 Luongo, T.S., Lambert, J.P., Yuan, A., Zhang, X., Gross, P., Song, J., Shanmughapriya, S.,  
442 Gao, E., Jain, M., Houser, S.R., *et al.* (2015). The Mitochondrial Calcium Uniporter Matches  
443 Energetic Supply with Cardiac Workload during Stress and Modulates Permeability Transition.  
444 *Cell Rep* 12, 23-34.
- 445 Mallilankaraman, K., Cardenas, C., Doonan, P.J., Chandramoorthy, H.C., Irrinki, K.M., Golenar,  
446 T., Csordas, G., Madireddi, P., Yang, J., Muller, M., *et al.* (2012a). MCUR1 is an essential  
447 component of mitochondrial Ca<sup>2+</sup> uptake that regulates cellular metabolism. *Nat Cell Biol* 14,  
448 1336-1343.
- 449 Mallilankaraman, K., Doonan, P., Cardenas, C., Chandramoorthy, H.C., Muller, M., Miller, R.,  
450 Hoffman, N.E., Gandhirajan, R.K., Molgo, J., Birnbaum, M.J., *et al.* (2012b). MICU1 is an  
451 essential gatekeeper for MCU-mediated mitochondrial Ca<sup>2+</sup> uptake that regulates cell  
452 survival. *Cell* 151, 630-644.
- 453 Meng, H., Yamashita, C., Shiba-Fukushima, K., Inoshita, T., Funayama, M., Sato, S., Hatta, T.,  
454 Natsume, T., Umitsu, M., Takagi, J., *et al.* (2017). Loss of Parkinson's disease-associated



- 455 protein CHCHD2 affects mitochondrial crista structure and destabilizes cytochrome c. *Nat*  
456 *Commun* **8**, 15500.
- 457 Nemani, N., Carvalho, E., Tomar, D., Dong, Z., Ketschek, A., Breves, S.L., Jana, F., Worth,  
458 A.M., Heffler, J., Palaniappan, P., *et al.* (2018). MIRO-1 Determines Mitochondrial Shape  
459 Transition upon GPCR Activation and Ca(2+) Stress. *Cell Rep* **23**, 1005-1019.
- 460 Paillard, M., Csordas, G., Huang, K.T., Varnai, P., Joseph, S.K., and Hajnoczky, G. (2018).  
461 MICU1 Interacts with the D-Ring of the MCU Pore to Control Its Ca(2+) Flux and Sensitivity to  
462 Ru360. *Mol Cell* **72**, 778-785 e773.
- 463 Patron, M., Checchetto, V., Raffaello, A., Teardo, E., Vecellio Reane, D., Mantoan, M.,  
464 Granatiero, V., Szabo, I., De Stefani, D., and Rizzuto, R. (2014). MICU1 and MICU2 finely tune  
465 the mitochondrial Ca<sup>2+</sup> uniporter by exerting opposite effects on MCU activity. *Mol Cell* **53**, 726-  
466 737.
- 467 Perocchi, F., Gohil, V.M., Girgis, H.S., Bao, X.R., McCombs, J.E., Palmer, A.E., and Mootha,  
468 V.K. (2010). MICU1 encodes a mitochondrial EF hand protein required for Ca(2+) uptake.  
469 *Nature* **467**, 291-296.
- 470 Phillips, C.B., Tsai, C.W., and Tsai, M.F. (2019). The conserved aspartate ring of MCU  
471 mediates MICU1 binding and regulation in the mitochondrial calcium uniporter complex. *Elife* **8**.
- 472 Plovanich, M., Bogorad, R.L., Sancak, Y., Kamer, K.J., Strittmatter, L., Li, A.A., Girgis, H.S.,  
473 Kuchimanchi, S., De Groot, J., Speciner, L., *et al.* (2013). MICU2, a paralog of MICU1, resides  
474 within the mitochondrial uniporter complex to regulate calcium handling. *PLoS One* **8**, e55785.
- 475 Raffaello, A., De Stefani, D., Sabbadin, D., Teardo, E., Merli, G., Picard, A., Checchetto, V.,  
476 Moro, S., Szabo, I., and Rizzuto, R. (2013). The mitochondrial calcium uniporter is a multimer  
477 that can include a dominant-negative pore-forming subunit. *EMBO J* **32**, 2362-2376.
- 478 Rizzuto, R., De Stefani, D., Raffaello, A., and Mammucari, C. (2012). Mitochondria as sensors  
479 and regulators of calcium signalling. *Nat Rev Mol Cell Biol* **13**, 566-578.
- 480 Rizzuto, R., and Pozzan, T. (2006). Microdomains of intracellular Ca<sup>2+</sup>: molecular determinants  
481 and functional consequences. *Physiol Rev* **86**, 369-408.
- 482 Sancak, Y., Markhard, A.L., Kitami, T., Kovacs-Bogdan, E., Kamer, K.J., Udeshi, N.D., Carr,  
483 S.A., Chaudhuri, D., Clapham, D.E., Li, A.A., *et al.* (2013). EMRE is an essential component of  
484 the mitochondrial calcium uniporter complex. *Science* **342**, 1379-1382.
- 485 Saotome, M., Safiulina, D., Szabadkai, G., Das, S., Fransson, A., Aspenstrom, P., Rizzuto, R.,  
486 and Hajnoczky, G. (2008). Bidirectional Ca<sup>2+</sup>-dependent control of mitochondrial dynamics by  
487 the Miro GTPase. *Proc Natl Acad Sci U S A* **105**, 20728-20733.
- 488 Scorrano, L., Ashiya, M., Buttler, K., Weiler, S., Oakes, S.A., Mannella, C.A., and Korsmeyer,  
489 S.J. (2002). A distinct pathway remodels mitochondrial cristae and mobilizes cytochrome c  
490 during apoptosis. *Dev Cell* **2**, 55-67.



- 491 Tadross, M.R., Dick, I.E., and Yue, D.T. (2008). Mechanism of local and global Ca<sup>2+</sup> sensing by  
492 calmodulin in complex with a Ca<sup>2+</sup> channel. *Cell* 133, 1228-1240.
- 493 Tarasenko, D., Barbot, M., Jans, D.C., Kroppen, B., Sadowski, B., Heim, G., Mobius, W.,  
494 Jakobs, S., and Meinecke, M. (2017). The MICOS component Mic60 displays a conserved  
495 membrane-bending activity that is necessary for normal cristae morphology. *J Cell Biol* 216,  
496 889-899.
- 497 Tomar, D., Dong, Z., Shanmughapriya, S., Koch, D.A., Thomas, T., Hoffman, N.E., Timbalia,  
498 S.A., Goldman, S.J., Breves, S.L., Corbally, D.P., *et al.* (2016). MCUR1 Is a Scaffold Factor for  
499 the MCU Complex Function and Promotes Mitochondrial Bioenergetics. *Cell Rep* 15, 1673-  
500 1685.
- 501 Tomar, D., Prajapati, P., Lavie, J., Singh, K., Lakshmi, S., Bhatelia, K., Roy, M., Singh, R.,  
502 Benard, G., and Singh, R. (2015). TRIM4; a novel mitochondrial interacting RING E3 ligase,  
503 sensitizes the cells to hydrogen peroxide (H<sub>2</sub>O<sub>2</sub>) induced cell death. *Free Radic Biol Med* 89,  
504 1036-1048.
- 505 Tufi, R., Gleeson, T.P., von Stockum, S., Hewitt, V.L., Lee, J.J., Terriente-Felix, A., Sanchez-  
506 Martinez, A., Ziviani, E., and Whitworth, A.J. (2019). Comprehensive Genetic Characterization  
507 of Mitochondrial Ca(2+) Uniporter Components Reveals Their Different Physiological  
508 Requirements In Vivo. *Cell Rep* 27, 1541-1550 e1545.
- 509 van der Laan, M., Horvath, S.E., and Pfanner, N. (2016). Mitochondrial contact site and cristae  
510 organizing system. *Curr Opin Cell Biol* 41, 33-42.
- 511 Xing, Y., Wang, M., Wang, J., Nie, Z., Wu, G., Yang, X., and Shen, Y. (2019). Dimerization of  
512 MICU Proteins Controls Ca(2+) Influx through the Mitochondrial Ca(2+) Uniporter. *Cell Rep* 26,  
513 1203-1212 e1204.

514 **Figure Legends**

515 **Figure 1. Identification of mtCU independent MICU1 interactors.** (A) Cleared cell lysates  
516 isolated from WT and *MCU*<sup>-/-</sup> HEK293T cells were fractionated by FPLC-based size exclusion  
517 chromatography. The protein fractions ranging from ~10kDa to ~900kDa were collected,  
518 concentrated, and subjected to immunoblotting using the MICU1 antibody. (B) Densitometry  
519 was performed to generate chromatographs of the MICU1 distribution in different fractions in  
520 Figure 1A. (C-D) MEFs stably expressing MICU1-FLAG were cultured on collagen-coated cover  
521 glass, were fixed with 4%PFA, and co-immunofluorescence was performed using FLAG and  
522 MCU antibodies. Images were acquired using an LSM 510 META Laser Scanning Microscope  
523 (Carl Zeiss, Inc.). Scale bar C= 10µm, C inset= 5µm, D= 5µm. (E) Experimental outline for the  
524 utilization of MICU1-BioID2-HA fusion protein to identify the mtCU-independent MICU1  
525 interactors via biotin-based proximity labeling. (F) HEK293T *MICU1*<sup>-/-</sup> cells were transfected with  
526 plasmids encoding BioID2-HA, and MICU1-BioID2-HA. Cells were cultured in the presence of  
527 biotin (50µM) for 16h to induce the biotinylation. Cells were collected, washed twice with PBS,  
528 lysed in BioID2 lysis buffer, western blotting with the indicated antibodies. (G) Mitochondria  
529 were isolated from HEK293T *MICU1*<sup>-/-</sup> cells reconstituted with MICU1-BioID2-HA. Mitochondrial  
530 fractions were subjected to increasing digitonin concentrations to permeabilize the outer  
531 mitochondrial membrane (OMM) and inner mitochondrial membrane (IMM). Proteinase K  
532 treatment was performed to cleave the exposed proteins, and mitochondrial fractions were  
533 probed with indicated antibodies. (H) HEK293T *MICU1*<sup>-/-</sup> and HEK293T *MCU*<sup>-/-</sup> cells were  
534 transfected with plasmids encoding BioID2-HA or MICU1-BioID2-HA. Cells were cultured in the  
535 presence or absence of biotin (50µM) for 16h. Cells were collected, washed with PBS 2 times,  
536 and lysed in BioID2 lysis buffer. An aliquot of the lysates were subjected to western blotting  
537 using the anti-BioID2 antibody and Streptavidin to validate effective biotinylation of cellular  
538 proteins. (I) Protein samples were subjected to Streptavidin based pull-down and digested with

539 trypsin. LC-MS/MS analysis of 10% of total digests in duplicate runs was performed by on-line  
540 analysis of peptides by a high-resolution, high-accuracy LC-MS/MS system (Thermo Fisher  
541 Scientific). Estimated protein abundance after global sample normalization was used to  
542 compare different groups.

543 **Figure 2. MICU1 directly interacts with MICOS components and is essential for the**  
544 **formation of high-molecular-weight MICOS. (A)** MICU1-HA and FLAG-tagged MICOS  
545 components co-expressed in the HEK293T *MICU1*<sup>-/-</sup> cells. Cell lysates of equal protein content  
546 were subjected to FLAG-immunoprecipitation (IP), and IP products were probed with FLAG and  
547 HA antibodies to detect the interaction between MICU1 and MICOS components. **(B-E)** MICU1-  
548 FLAG expressing MEFs were cultured on the collagen-coated cover glass and fixed with PFA,  
549 then co-immunofluorescence was performed using FLAG and MIC60 (B, C), or CHCHD2 (D, E)  
550 antibodies. Images were acquired using an LSM 510 META Laser Scanning Microscope (Carl  
551 Zeiss, Inc.). Merged images show the co-localization between the MICU1 and MIC60 or  
552 CHCHD2. Line scan shows the presence of MICU1 with both the MICOS components. Scale  
553 bar B, D= 10µm; C, E inset= 5µm. **(F, H)** FPLC was performed using cleared cell lysates from  
554 WT, *MCU*<sup>-/-</sup>, and *MICU1*<sup>-/-</sup> HEK293T cells, and fractions were collected and subjected to western  
555 blotting using the MIC60 (F), and CHCHD2 (H) antibodies. The loss of MICU1 alters the size  
556 distribution of the multimeric MICOS complex. **(G, I)** Densitometry was performed to generate  
557 chromatographs of the MICOS components distribution in different molecular weight fractions in  
558 Figure 2F and 2H.

559 **Figure 3. *MICU1*<sup>-/-</sup> cells show altered cristae structure and enhanced cytochrome c**  
560 **release. (A)** WT and *MICU1*<sup>-/-</sup> HEK293T cells were grown on Thermanox® Cover Slips and  
561 processed for the TEM imaging. Images were acquired by a Zeiss LIBRA120 TEM equipped  
562 with Gatan UltraScan, 1000 2k x 2k CCD EFTEM, energy filtering. *MICU1*<sup>-/-</sup> cells show distinct  
563 alterations in cristae organization and mitochondrial ultrastructure. Scale bar = 500nm. **(B-F)**

564 TEM images were analyzed and quantitated using the Image J Fiji. Mitochondrial perimeter (B),  
565 feret diameter (C), aspect ratio (D), inter-cristae junction distance (E), and cristae junction width  
566 (F) were plotted. Statistical significance was determined using t-test. \* indicates  $p < 0.05$ .  $n = 200$ -  
567 300 mitochondria. **(G)** *Micu1<sup>+/+</sup>* and *Micu1<sup>-/-</sup>* MEFs were grown in 150mm<sup>2</sup> culture dishes, and  
568 cytochrome c release assay was performed. *Micu1<sup>-/-</sup>* MEFs show enhanced basal and tBid-  
569 induced cytochrome c release. **(H)** Densitometry was performed to quantify the cytochrome c  
570 release in different groups in Figure 3G. Statistical significance was determined using t-test. \*  
571 indicates  $p < 0.05$ .  $n = 3$ .

572 **Supplementary Figure Legends**

573 **Figure S1: (A)** Western blot confirming the loss of MICU1 in *Micu1*<sup>-/-</sup> MEFs. **(B)** Representative  
574 trace showing  $_m\text{Ca}^{2+}$  uptake in WT and *MICU1*<sup>-/-</sup> HEK293T cells expressing BioID2-HA, or  
575 MICU1-BioID2-HA fusion protein.

576 **Figure S2: (A)** MICU1-FLAG was reconstituted in *MICU1*<sup>-/-</sup> HEK293T cells, and FLAG-IP was  
577 performed to detect the interaction with endogenous MICOS components. **(B)** FPLC was  
578 performed using cleared cell lysates from WT, *MCU*<sup>-/-</sup>, and *MICU1*<sup>-/-</sup> HEK293T cells, and  
579 immunoblotted for CHCHD3. **(C)** Densitometry was performed to generate chromatographs of  
580 the CHCHD3 distribution in different fractions from the cells shown in Figure S2B.

581 **Figure S3. (A)** Representative trace for  $_m\text{Ca}^{2+}$  influx/efflux in *Chchd2*<sup>+/+</sup> and *Chchd2*<sup>-/-</sup> MEFs. **(B-**  
582 **C)**  $_m\text{Ca}^{2+}$  uptake and efflux rate. **(D-E)** FPLC analysis for native MCU protein complexes  
583 distribution in *Chchd2*<sup>+/+</sup> and *Chchd2*<sup>-/-</sup> MEFs. The loss of *Chchd2* does not have any effect on  
584 the size distribution of the mtCU complex.

585 **Table S1:** MICU1 proximal MICOS components protein abundance in *MCU<sup>+/+</sup>* and *MCU<sup>-/-</sup>* cells

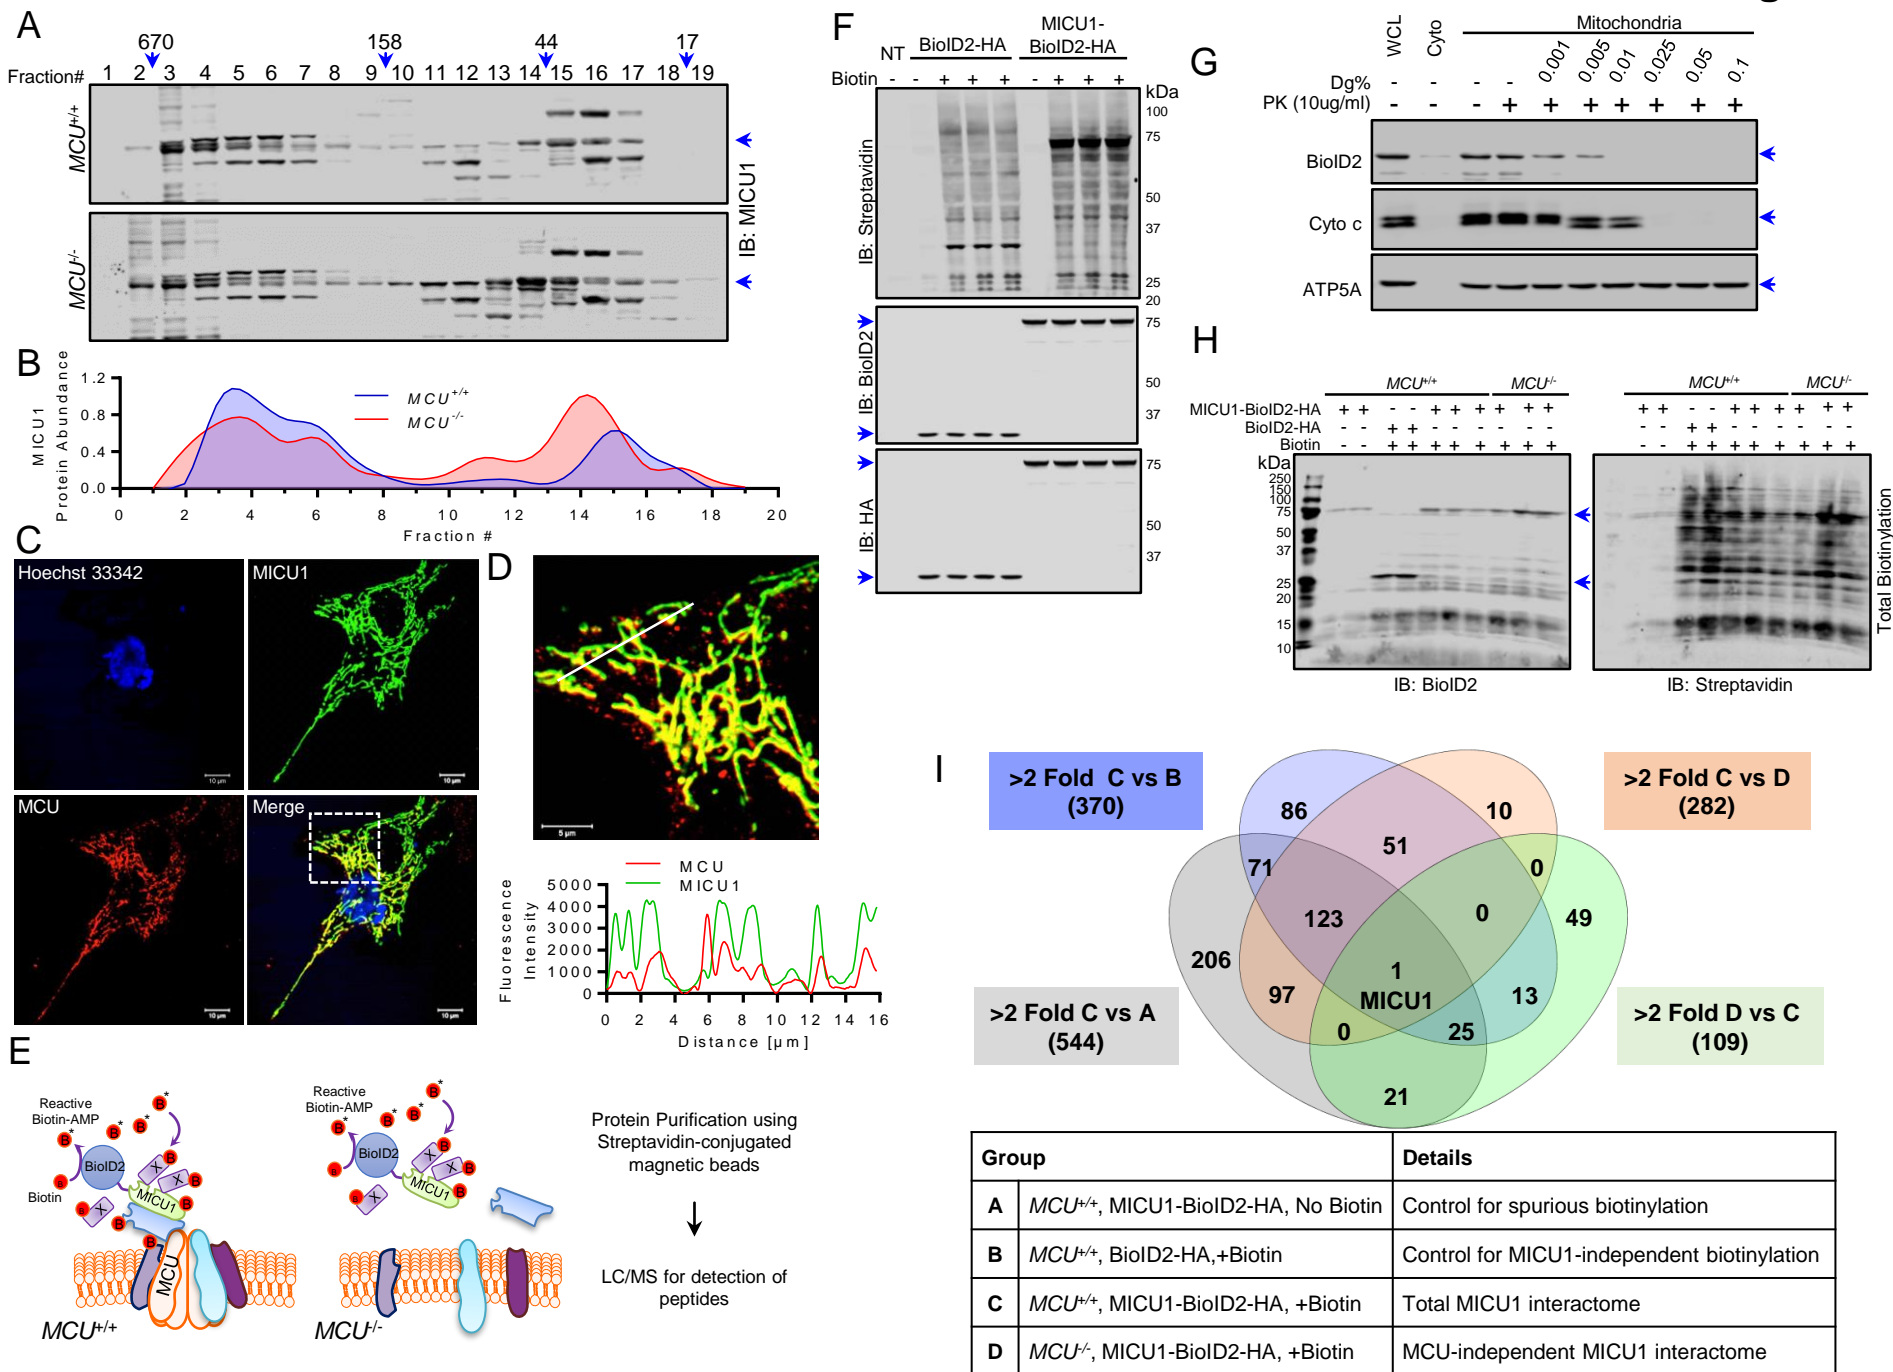

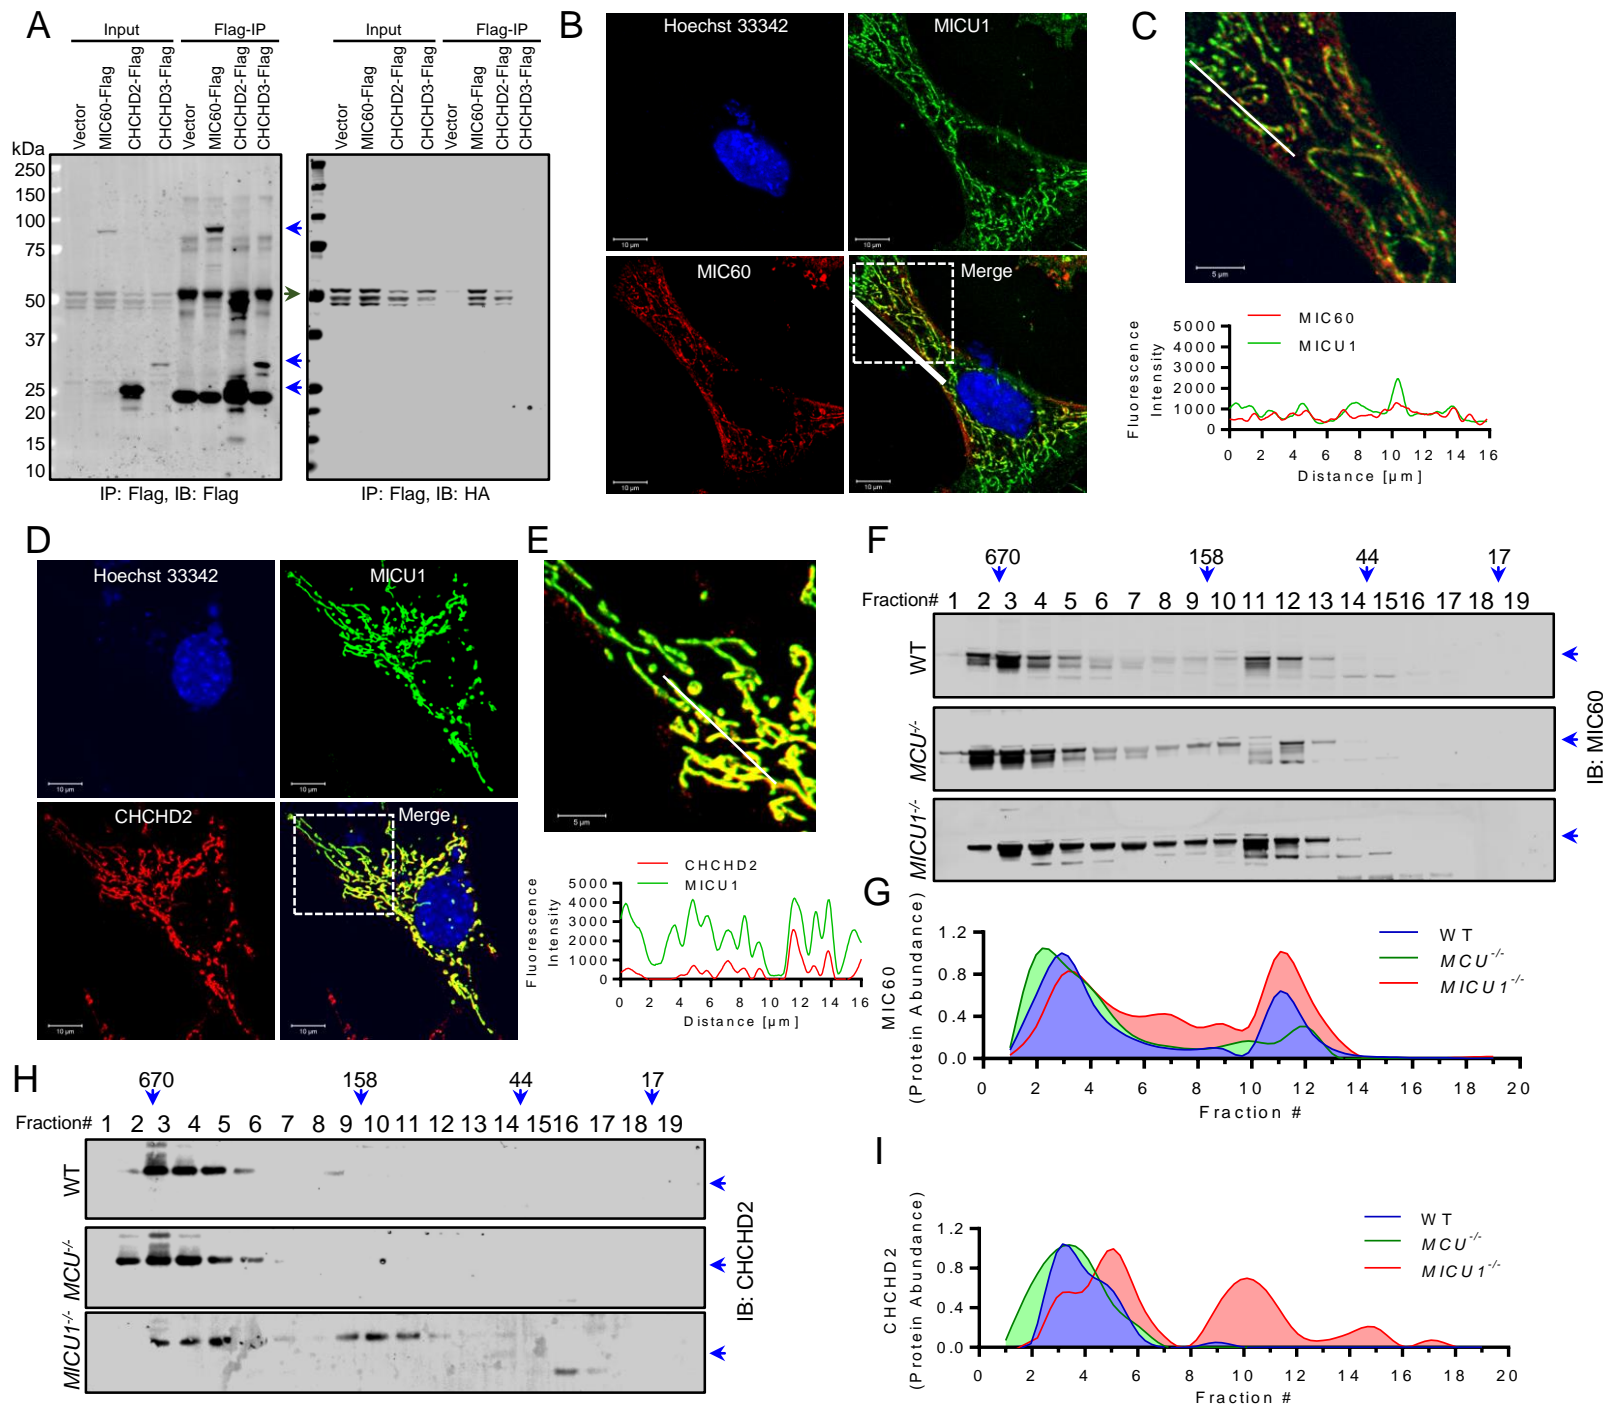



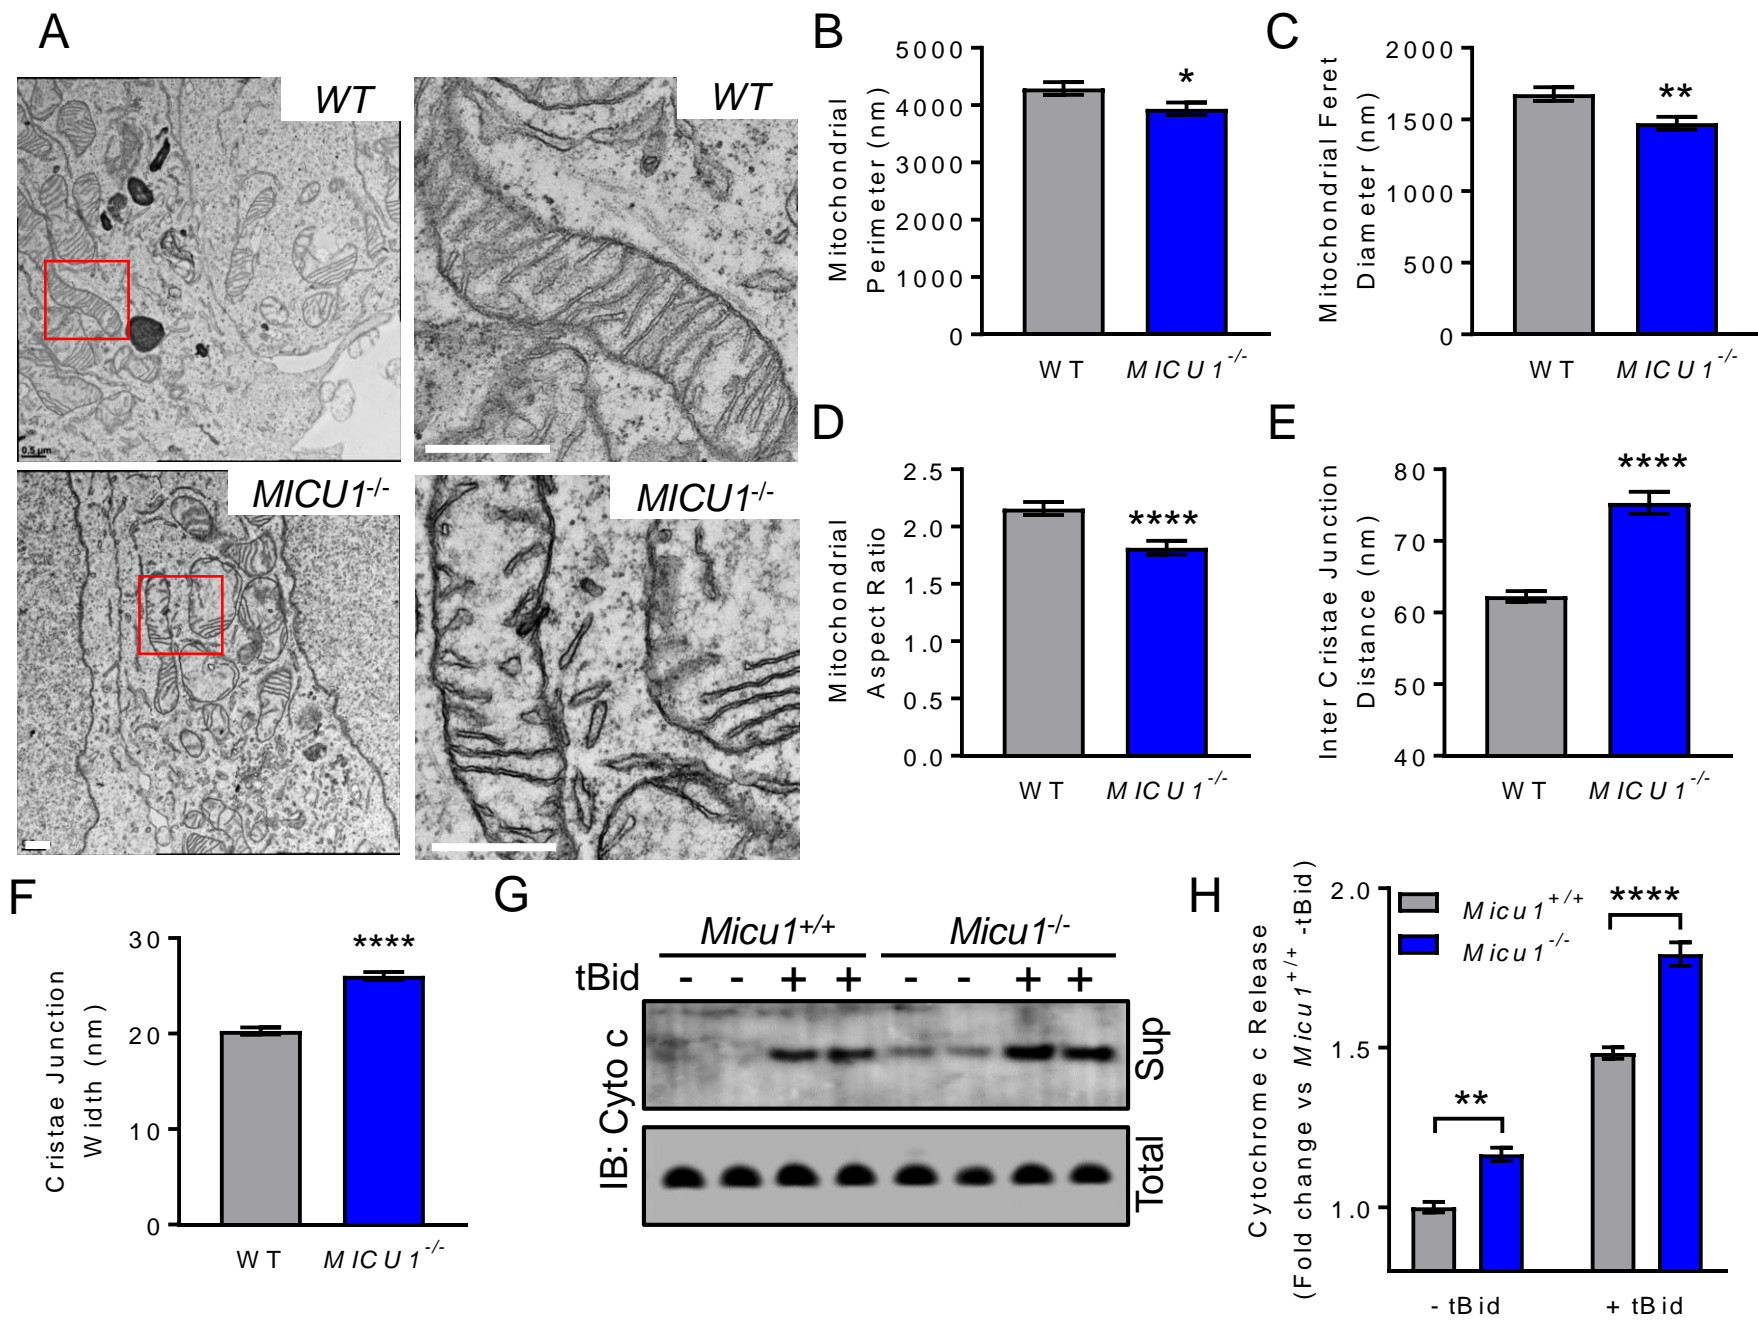

**A**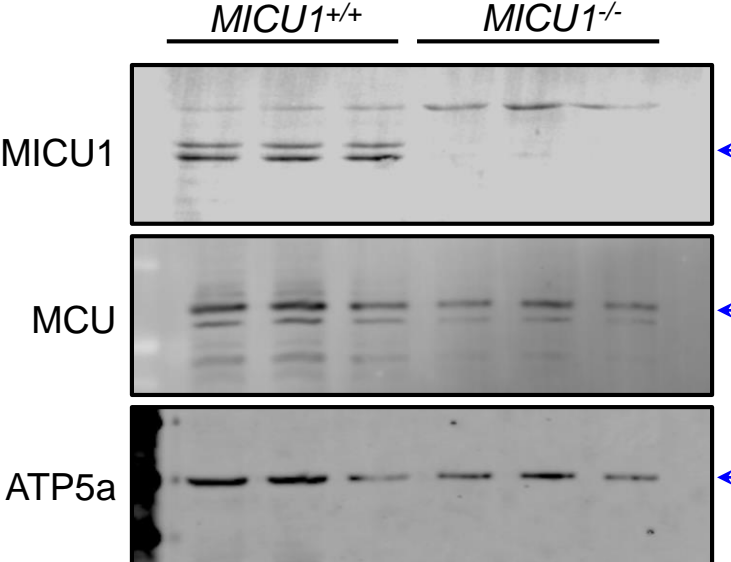**B**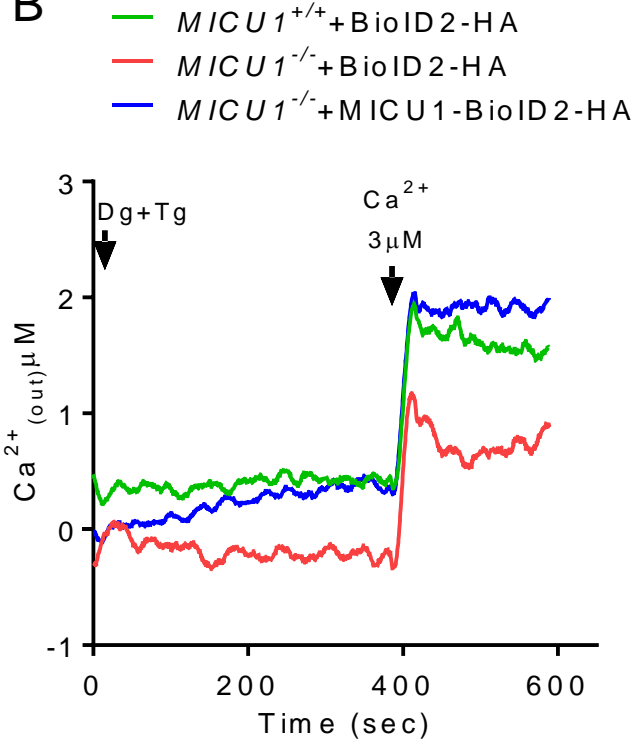

A

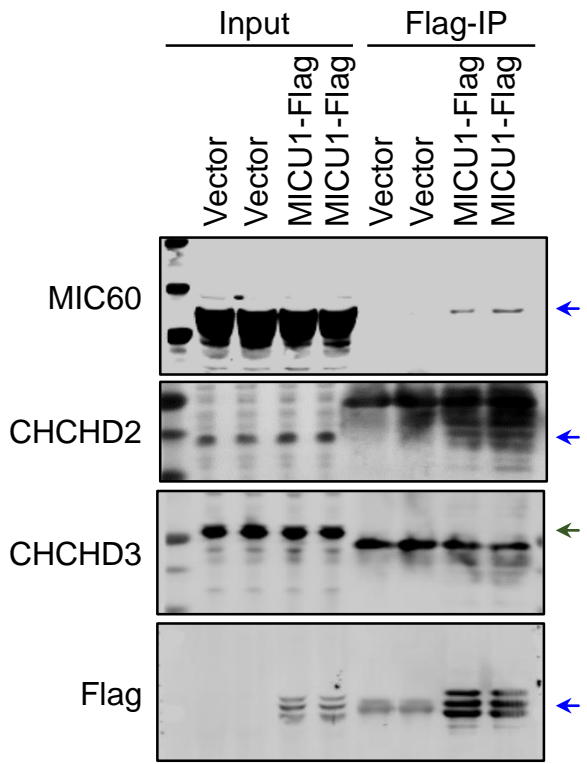

B

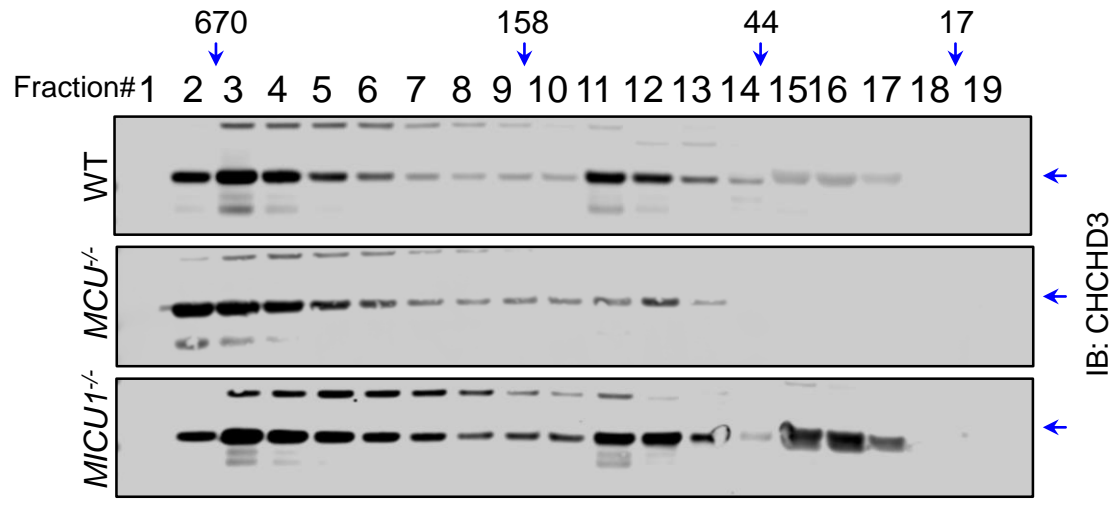

C

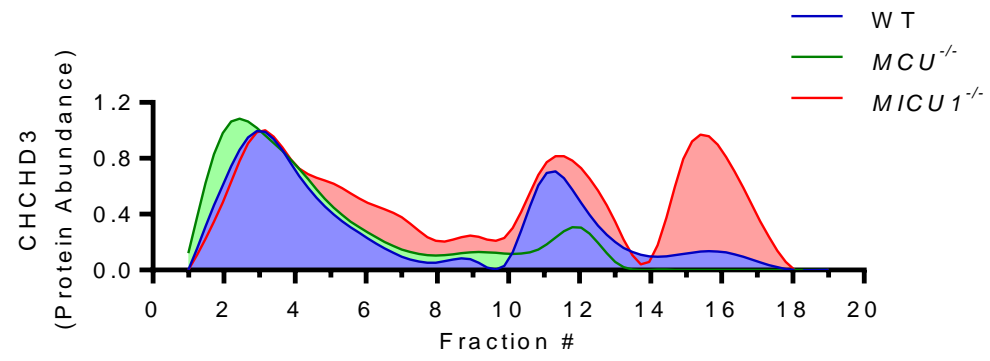

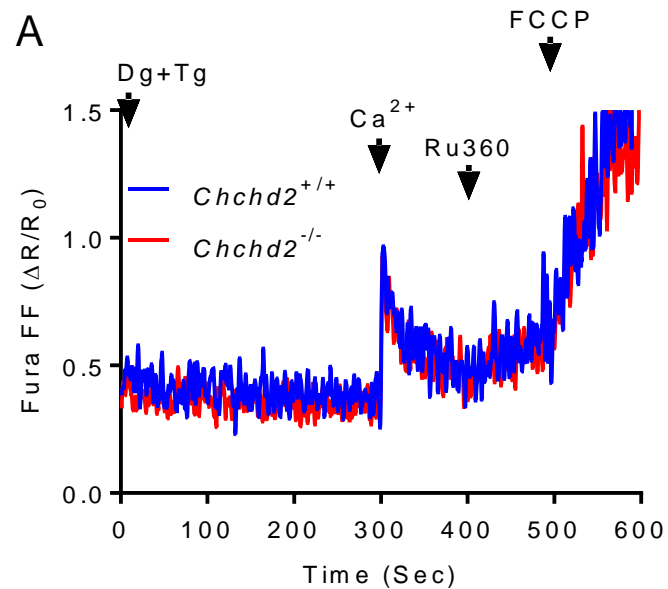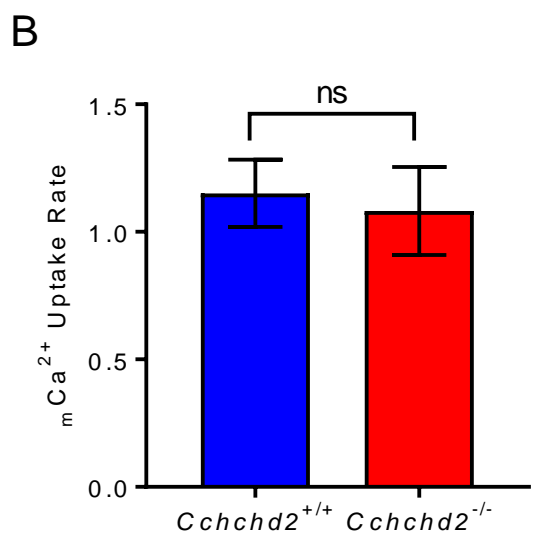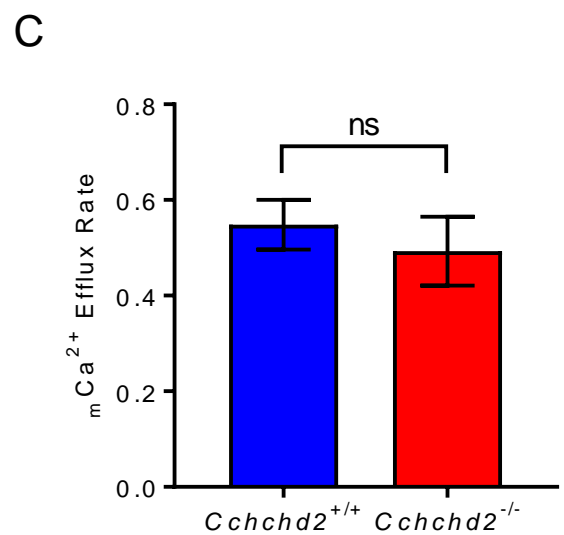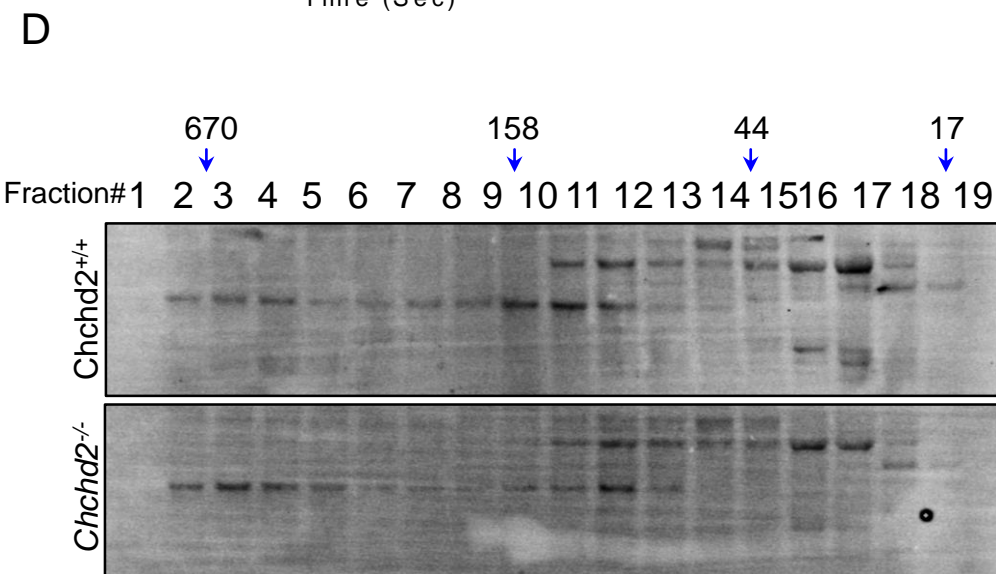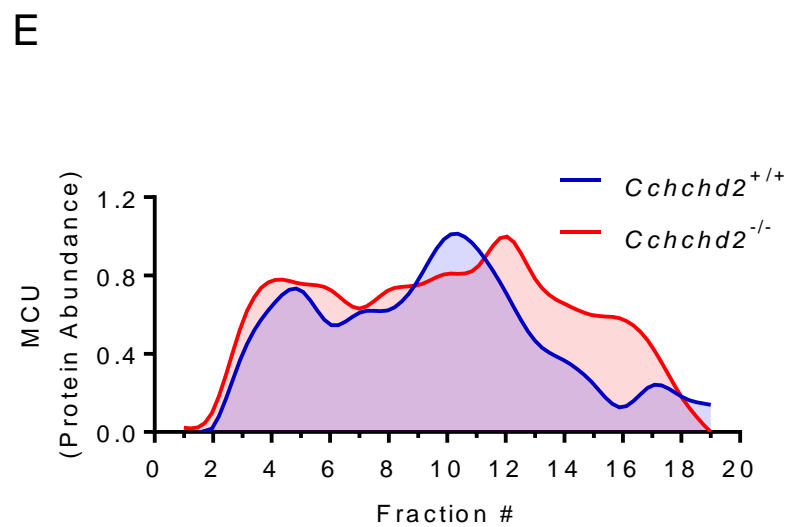

Source: http://biorxiv.org/content/10.1101/803213v1.full.pdf
